# Supplementary material for: Development of Intron Polymorphism Markers and Their Association With Fatty Acid Component Variation in Oil Palm
Source: Front Plant Sci. 2022 Jun 2;13:885418. doi: 10.3389/fpls.2022.885418 (PMC9201816; doi:10.3389/fpls.2022.885418)
Supplement: Supplementary file 1 [file Table_1.xlsx]

## Sheet: Sheet1
No.	Position	Latitute	Longitude	Tree age
1S-1	Wenchang city of Hainan province	19.53	110.76	Seven years
1N-1	Wenchang city of Hainan province	19.53	110.76	Seven years
1N-1	Wenchang city of Hainan province	19.53	110.76	Seven years
2S-3	Wenchang city of Hainan province	19.53	110.76	Seven years
2N-2	Wenchang city of Hainan province	19.53	110.76	Seven years
2N-7	Wenchang city of Hainan province	19.53	110.76	Seven years
3S-1	Wenchang city of Hainan province	19.53	110.76	Seven years
3S-3	Wenchang city of Hainan province	19.53	110.76	Seven years
3N-1	Wenchang city of Hainan province	19.53	110.76	Seven years
3N-6	Wenchang city of Hainan province	19.53	110.76	Seven years
4S-1	Wenchang city of Hainan province	19.53	110.76	Seven years
4S-3	Wenchang city of Hainan province	19.53	110.76	Seven years
4N-3	Wenchang city of Hainan province	19.53	110.76	Seven years
4N-5	Wenchang city of Hainan province	19.53	110.76	Seven years
5S-1	Wenchang city of Hainan province	19.53	110.76	Seven years
5S-2	Wenchang city of Hainan province	19.53	110.76	Seven years
5N-1	Wenchang city of Hainan province	19.53	110.76	Seven years
5N-2	Wenchang city of Hainan province	19.53	110.76	Seven years
5N-4	Wenchang city of Hainan province	19.53	110.76	Seven years
6S-3	Wenchang city of Hainan province	19.53	110.76	Seven years
6N-5	Wenchang city of Hainan province	19.53	110.76	Seven years
7S-3	Wenchang city of Hainan province	19.53	110.76	Seven years
7S-4	Wenchang city of Hainan province	19.53	110.76	Seven years
7N-1	Wenchang city of Hainan province	19.53	110.76	Seven years
7N-3	Wenchang city of Hainan province	19.53	110.76	Seven years
7N-5	Wenchang city of Hainan province	19.53	110.76	Seven years
8S-1	Wenchang city of Hainan province	19.53	110.76	Seven years
8S-2	Wenchang city of Hainan province	19.53	110.76	Seven years
8N-1	Wenchang city of Hainan province	19.53	110.76	Seven years
8N-3	Wenchang city of Hainan province	19.53	110.76	Seven years
9S-1	Wenchang city of Hainan province	19.53	110.76	Seven years
9N-2	Wenchang city of Hainan province	19.53	110.76	Seven years
9N-5	Wenchang city of Hainan province	19.53	110.76	Seven years
10N-1	Wenchang city of Hainan province	19.53	110.76	Seven years
10N-4	Wenchang city of Hainan province	19.53	110.76	Seven years
11S-3	Wenchang city of Hainan province	19.53	110.76	Seven years
11N-1	Wenchang city of Hainan province	19.53	110.76	Seven years
12S-2	Wenchang city of Hainan province	19.53	110.76	Seven years
12S-3	Wenchang city of Hainan province	19.53	110.76	Seven years
12N-1	Wenchang city of Hainan province	19.53	110.76	Seven years
12N-2	Wenchang city of Hainan province	19.53	110.76	Seven years
13S-1	Wenchang city of Hainan province	19.53	110.76	Seven years
13S-2	Wenchang city of Hainan province	19.53	110.76	Seven years
13N-1	Wenchang city of Hainan province	19.53	110.76	Seven years
13N-2	Wenchang city of Hainan province	19.53	110.76	Seven years
14S-1	Wenchang city of Hainan province	19.53	110.76	Seven years
15S-2	Wenchang city of Hainan province	19.53	110.76	Seven years
15N-1	Wenchang city of Hainan province	19.53	110.76	Seven years
15N-3	Wenchang city of Hainan province	19.53	110.76	Seven years
16S-1	Wenchang city of Hainan province	19.53	110.76	Seven years
16S-2	Wenchang city of Hainan province	19.53	110.76	Seven years
16S-3	Wenchang city of Hainan province	19.53	110.76	Seven years
16N-1	Wenchang city of Hainan province	19.53	110.76	Seven years
17S-1	Wenchang city of Hainan province	19.53	110.76	Seven years
17S-5	Wenchang city of Hainan province	19.53	110.76	Seven years
17S-6	Wenchang city of Hainan province	19.53	110.76	Seven years
17N-1	Wenchang city of Hainan province	19.53	110.76	Seven years
17N-2	Wenchang city of Hainan province	19.53	110.76	Seven years
18S-1	Wenchang city of Hainan province	19.53	110.76	Seven years
18S-2	Wenchang city of Hainan province	19.53	110.76	Seven years
18N-1	Wenchang city of Hainan province	19.53	110.76	Seven years
18N-2	Wenchang city of Hainan province	19.53	110.76	Seven years
18N-3	Wenchang city of Hainan province	19.53	110.76	Seven years
19S-2	Wenchang city of Hainan province	19.53	110.76	Seven years
19N-1	Wenchang city of Hainan province	19.53	110.76	Seven years
19N-2	Wenchang city of Hainan province	19.53	110.76	Seven years
19N-3	Wenchang city of Hainan province	19.53	110.76	Seven years
20S-1	Wenchang city of Hainan province	19.53	110.76	Seven years
20N-1	Wenchang city of Hainan province	19.53	110.76	Seven years
20N-2	Wenchang city of Hainan province	19.53	110.76	Seven years
